# Supplementary material for: A dog nose-inspired high-performance NH3 gas sensor of biomass carbon materials with a pleated structure derived from rose tea
Source: Royal Society of Chemistry journal article supplement (doi:10.1039/d2ta02670h), 2022-01-01
Supplement: d2ta02670h1.pdf [file d2ta02670h1.pdf]

## Electronic Supplementary Information

### **Dog nose inspired high-performance NH<sub>3</sub> gas sensor of biomass carbon materials with pleated structure derived from rose tea**

Qihua Sun,<sup>a,b</sup> Zhaofeng Wu,<sup>a,b\*</sup> Zhangjie Qin,<sup>a,b</sup> Xuan Chen,<sup>a,b</sup> Chuanchuan Zhang,<sup>a,b</sup>

Biaobing Cao,<sup>a,b</sup> Haiming Duan,<sup>a,b\*</sup> Jun Zhang<sup>a,b\*</sup>

*<sup>a</sup>Xinjiang Key Laboratory of Solid State Physics and Devices, Urumqi, Xinjiang 830046,  
China*

*<sup>b</sup>School of Physics Science and Technology, Xinjiang University, Urumqi, Xinjiang  
830046, China*

\*Corresponding author.

Zhao Feng Wu, Hai Ming Duan, and Jun Zhang

E-mail address: wuzf@xju.edu.cn; dhm@xju.edu.cn; zhj@xju.edu.cn

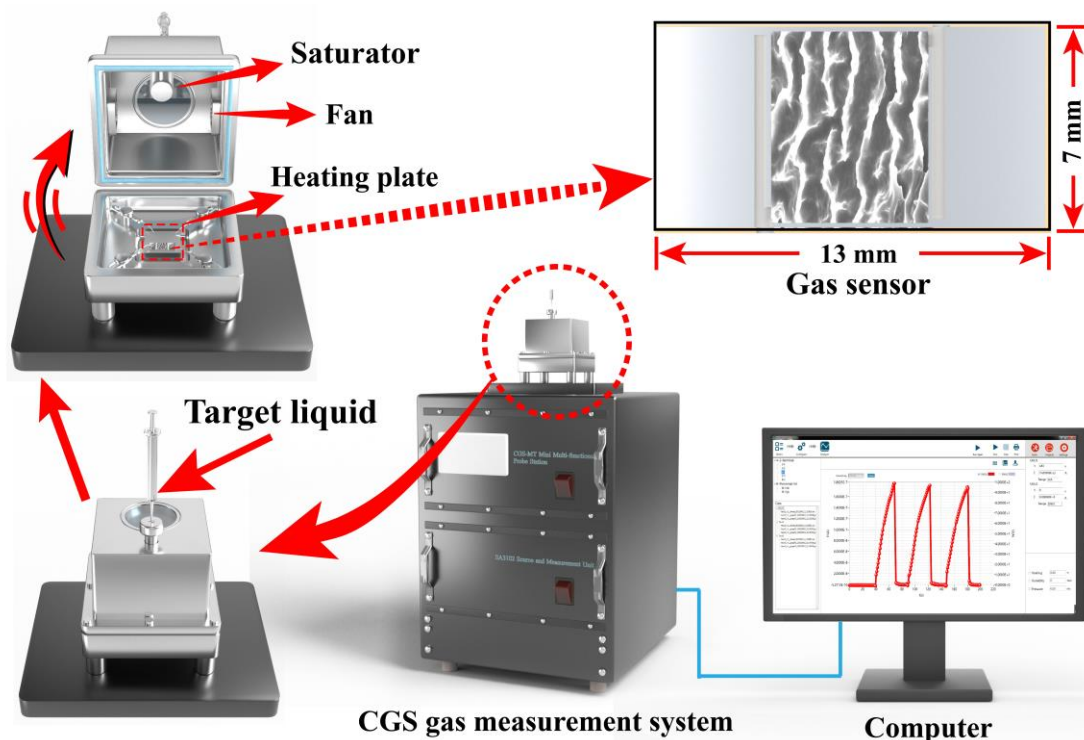

**Fig. S1** Schematic diagram of the sensing test of the CRT sensor.

All target gases or vapours are generated by thermal evaporation by the following equation:<sup>1</sup>

$$Q=(V\times C\times M)/(22.4\times d\times\rho)\times 10^{-9}\times(273+T_R)/(273+T_C) \quad (1)$$

In the above equation, Q and V are the volume of the liquid to be taken and the volume of the test vessel, respectively. M is the molecular weight of the substance, d is the purity of the liquid, C is the concentration of the gas to be dispensed,  $\rho$  is the density of the liquid,  $T_R$  and  $T_C$  are the ambient temperature of the test and the temperature inside the test vessel. As shown in **Fig. S1**, the calculated target liquid is injected with a syringe into the liquid vaporizer (100°C), which is equipped with fans on both sides to rapidly produce the target vapor (or gas) in the chamber. The CGS gas sensing measurement system will record the change in the current signal of the sensing chip.

- 1 S. Cao, Z. Wu, Q. Sun, W. Zhang, S. Beysen, S. Wang, T. Shaymurat, M. Zhang and H. Duan, *Sensors and Actuators B: Chemical*, 2021, **337**, 129818. <https://doi.org/10.1016/j.snb.2021.129818>

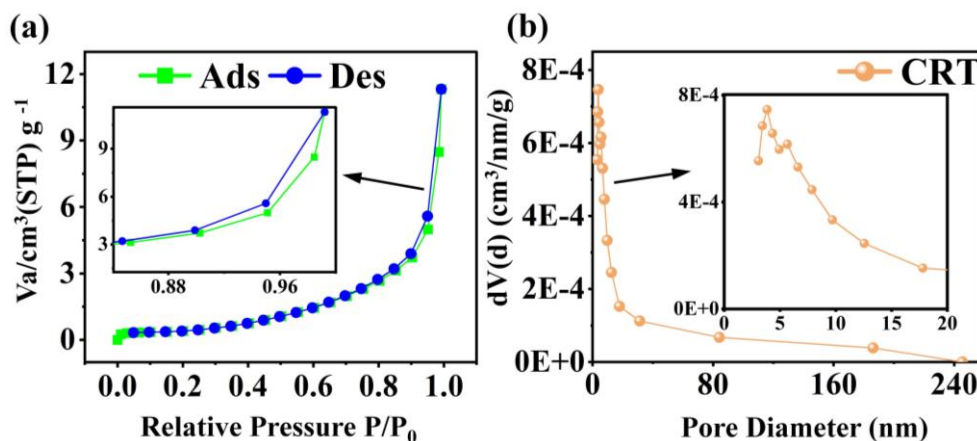

**Fig. S2** (a) CRT nitrogen adsorption and desorption isotherms and (b) pore size distribution.

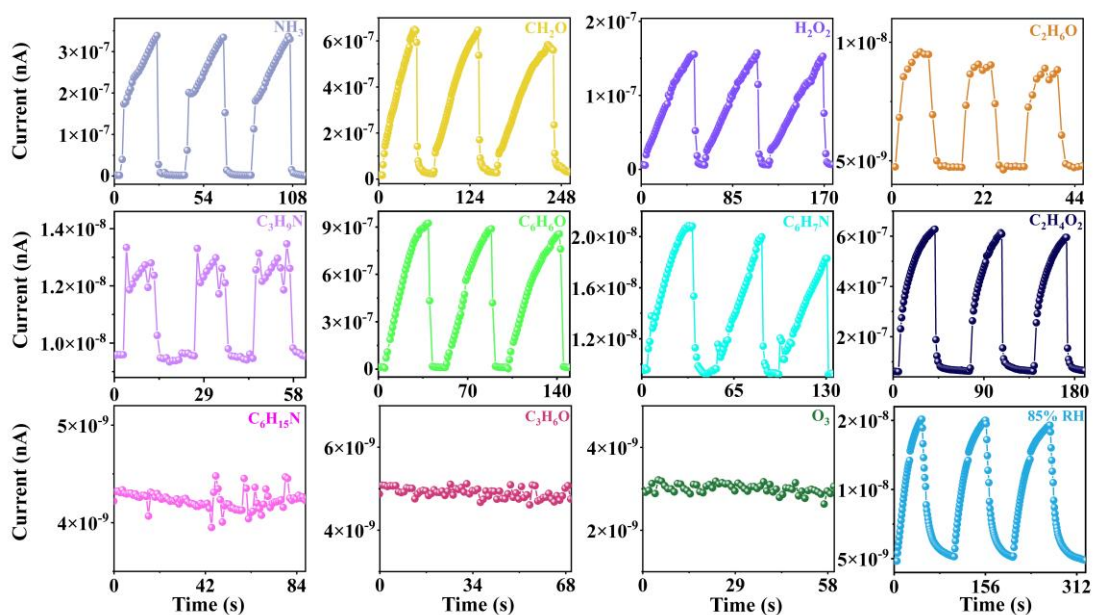

**Fig. S3** Current curves of CRT towards 500 ppm  $\text{NH}_3$ , 1000 ppm of  $\text{CH}_2\text{O}$ ,  $\text{H}_2\text{O}_2$ ,  $\text{C}_2\text{H}_6\text{O}$ ,  $\text{C}_3\text{H}_6\text{O}$ ,  $\text{C}_3\text{H}_9\text{N}$ ,  $\text{C}_6\text{H}_{15}\text{N}$ ,  $\text{C}_6\text{H}_6\text{O}$ ,  $\text{C}_6\text{H}_7\text{N}$ , 50 ppm  $\text{O}_3$  and 85% RH at room temperature.

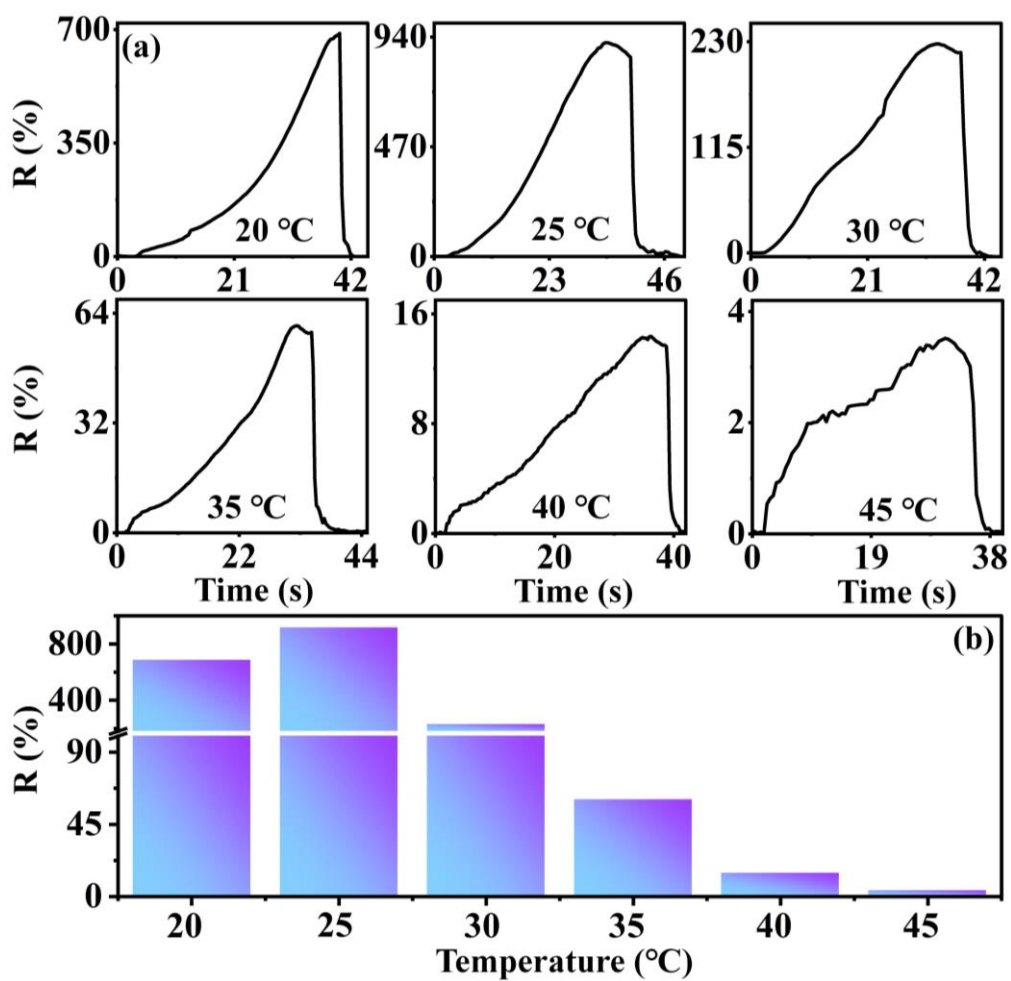

**Fig. S4** (a) Response curves of the CRT sensor to 3 ppm NH<sub>3</sub> at different operating temperatures (20-45 °C) and corresponding (b) statistical diagrams of temperature and response.

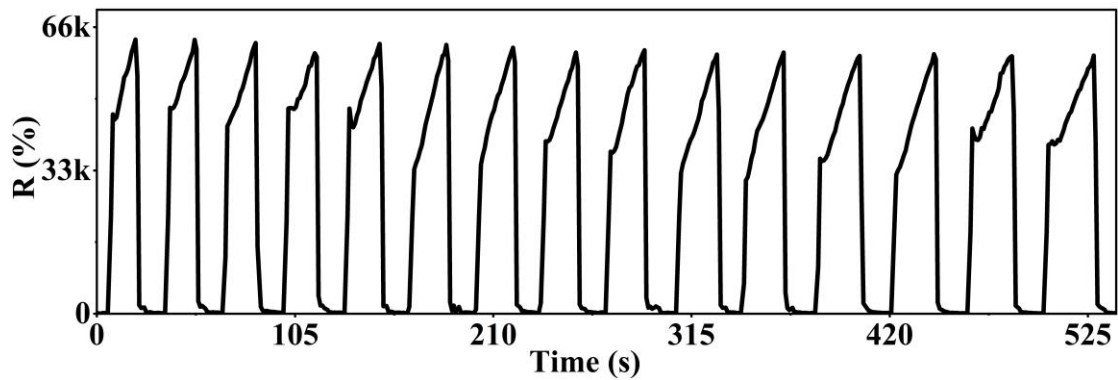

**Fig. S5** Sensing curve of CRT sensor to 500 ppm NH<sub>3</sub> cycling for 15 cycles.

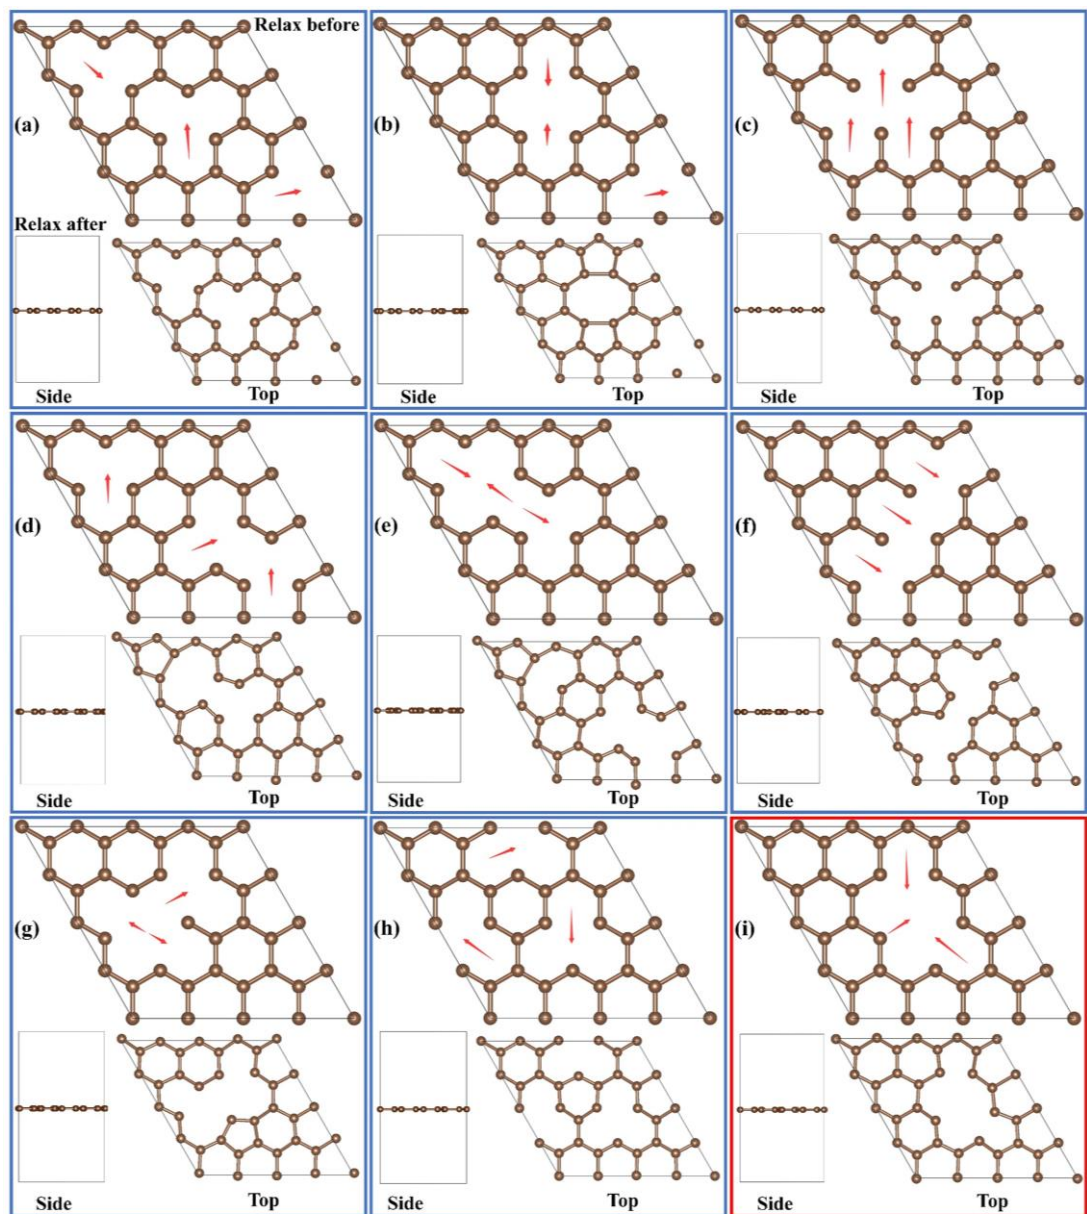

Relax after Energy (eV)= (a)-245.16538374 (b)-252.07899970 (c)-245.8203288 (d)-247.9050965 (e)-252.76364968  
 (f)-249.6640608 (g)-254.0445376 (h)-245.6267018 (i)-256.18907995

**Fig. S6 (a-i)** Nine defective configurations without K-doping.

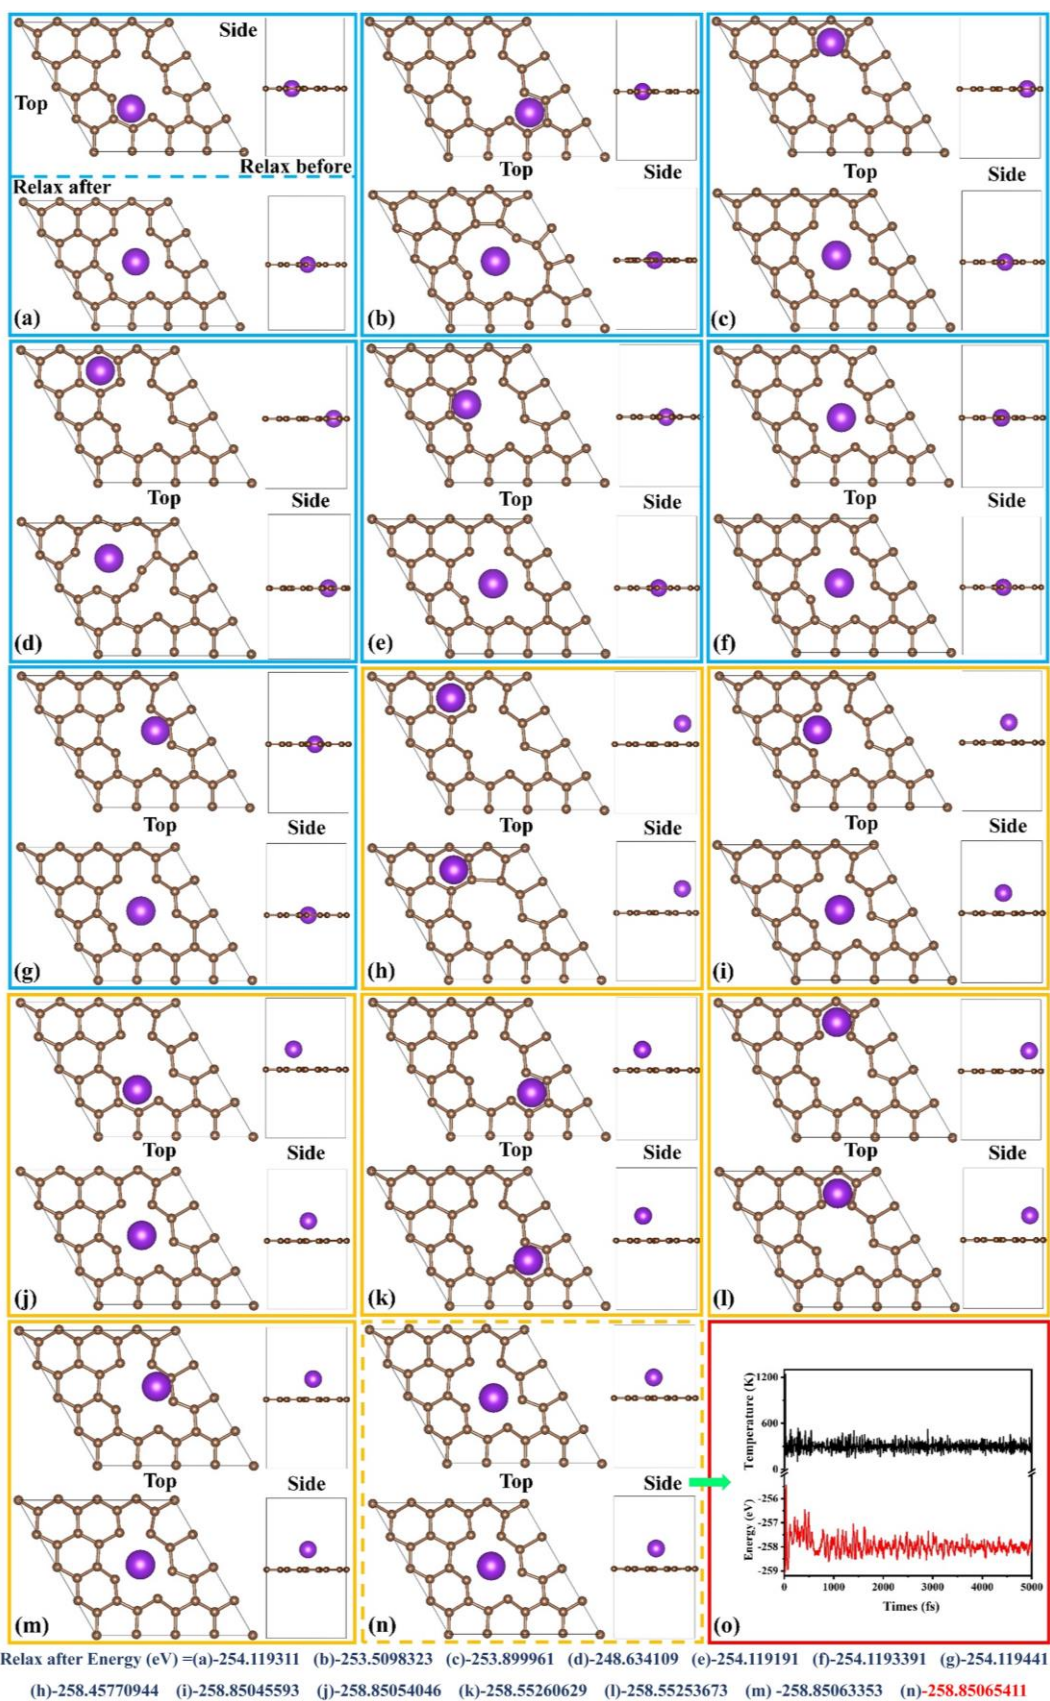

**Fig. S7** (a-n) Possible structural configurations of CRTs and (o) Energy variation and temperature fluctuation of most stable configuration at the temperature of 300 K.
